# Supplementary material for: Cross-Neutralisation of Novel Bombali Virus by Ebola Virus Antibodies and Convalescent Plasma Using an Optimised Pseudotype-Based Neutralisation Assay
Source: MDPI journal article supplement (doi:10.3390/tropicalmed6030155), 2021-08-25
Supplement: s1 [file s1]

|                                                |                                                                        |     |
|------------------------------------------------|------------------------------------------------------------------------|-----|
| EBOV/Makona/GIN/2014/Kissidougou-C15           | MGVTGILQLPRDRFKRTSFLLWVILFQRTFSIPLGVHNSLTQVSDVKLVCRDKLSST              | 60  |
| BOMV/M. condylurus/SLE/2016/PREDICT_SLAB000156 | ---MILQVPEKRRHQTVLFIWLVLVLFQRAVSVPLGVHNSLTQVSDIKLVCHDKLTST             | 56  |
| BOMV/C. pumilus/SLE/2016/PREDICT_SLAB000047    | ----MILQVPEKRRHQTVLFIWLVLVLFQRAVSVPLGVHNSLTQVSDIKLVCHDKLTST            | 56  |
| BOMV/M. condylurus/Kenya/2018/B241             | ----MILQVPEKRRHQTVLFIWLVLVLFQRAVSVPLGVHNSLTQVSDIKLVCHDKLTST            | 56  |
| BOMV/M. condylurus/Kenya/2019/X030             | ----MILQVPEKRRHQTVLFIWLVLVLFQRAVSVPLGVHNSLTQVSDIKLVCHDKLTST            | 56  |
| BOMV/M. condylurus/Kenya/2019/Z153             | ---MILQVPEKRRHQTVLFIWLVLVLFQRAVSVPLGVHNSLTQVSDIKLVCHDKLTST             | 56  |
|                                                | ***:..*.*.* :*:..*.*.*:..*.*.*:..*.*.*:..*.*.*:..*.*.*:..*.*.*:..*.*.* |     |
| EBOV/Makona/GIN/2014/Kissidougou-C15           | NQLRSVGLNLEGNVATVPSATKRWGFRAGVPPKVVNVEAGEWAENCYNLEIKPKDSE              | 120 |
| BOMV/M. condylurus/SLE/2016/PREDICT_SLAB000156 | NQLRSIGLNLENGIATVPSATKRWGFRAGVPPKVVVGEAGEWAENCYNLEIKPKDSE              | 116 |
| BOMV/C. pumilus/SLE/2016/PREDICT_SLAB000047    | NQLRSIGLNLENGIATVPSATKRWGFRAGVPPKVVVGEAGEWAENCYNLEIKPKDSE              | 116 |
| BOMV/M. condylurus/Kenya/2018/B241             | NQLRSIGLNLENGIATVPSATKRWGFRAGVPPKVVVGEAGEWAENCYNLEIKPKDSE              | 116 |
| BOMV/M. condylurus/Kenya/2019/X030             | NQLRSIGLNLENGIATVPSATKRWGFRAGVPPKVVVGEAGEWAENCYNLEIKPKDSE              | 116 |
| BOMV/M. condylurus/Kenya/2019/Z153             | NQLRSIGLNLENGIATVPSATKRWGFRAGVPPKVVVGEAGEWAENCYNLEIKPKDSE              | 116 |
|                                                | *****:..*.*.*:..*.*.*:..*.*.*:..*.*.*:..*.*.*:..*.*.*:..*.*.*:..*.*.*  |     |
| EBOV/Makona/GIN/2014/Kissidougou-C15           | CLPAAPDGIIRGFPRCRYVHKVSGTGPCAGDHAFHKEGAFFLYDRLASTIIVYRGTTFAEV          | 180 |
| BOMV/M. condylurus/SLE/2016/PREDICT_SLAB000156 | CLPMAPEGIRGFFPRCRYVHKVSGTGSCSGHAFHKEGAFFLYDRLASTIIVYRGTTFAEV           | 176 |
| BOMV/C. pumilus/SLE/2016/PREDICT_SLAB000047    | CLPMAPEGIRGFFPRCRYVHKVSGTGPCSGHAFHKEGAFFLYDRLASTIIVYRGTTFAEV           | 176 |
| BOMV/M. condylurus/Kenya/2018/B241             | CLPMAPEGIRGFFPRCRYVHKVSGTGSCSGHAFHKEGAFFLYDRLASTIIVYRGTTFAEV           | 176 |
| BOMV/M. condylurus/Kenya/2019/X030             | CLPMAPEGIRGFFPRCRYVHKVSGTGSCSGHAFHKEGAFFLYDRLASTIIVYRGTTFAEV           | 176 |
| BOMV/M. condylurus/Kenya/2019/Z153             | CLPMAPEGIRGFFPRCRYVHKVSGTGSCSGHAFHKEGAFFLYDRLASTIIVYRGTTFAEV           | 176 |
|                                                | *** *:..*.*.*:..*.*.*:..*.*.*:..*.*.*:..*.*.*:..*.*.*:..*.*.*          |     |
| EBOV/Makona/GIN/2014/Kissidougou-C15           | VAFILLPQAKKDFSSHPLREPVNATEDPSSGYSTTIRYQATGFGTNETEYLFVENDLT             | 240 |
| BOMV/M. condylurus/SLE/2016/PREDICT_SLAB000156 | VAFIILPKAEKNFLQPLTQGTNTTNDPSSMYHSTTLEYETTRGNNRSFAFWKVDNLT              | 236 |
| BOMV/C. pumilus/SLE/2016/PREDICT_SLAB000047    | VAFIILPKAEKNFLQPLTQGTNTTNDPSSMYHSTTLEYETTRGNNRSFAFWKVDNLT              | 236 |
| BOMV/M. condylurus/Kenya/2018/B241             | VAFIILPKAEKNFLQPLTQGTNTTNDPSSMYHSTTLEYETTRGNNRSFAFWKVDNLT              | 236 |
| BOMV/M. condylurus/Kenya/2019/X030             | VAFIILPKAEKNFLQPLTQGTNTTNDPSSMYHSTTLEYETTRGNNRSFAFWKVDNLT              | 236 |
| BOMV/M. condylurus/Kenya/2019/Z153             | VAFIILPKAEKNFLQPLTQGTNTTNDPSSMYHSTTLEYETTRGNNRSFAFWKVDNLT              | 236 |
|                                                | ***:***:*.*:..*.*.*:..*.*.*:..*.*.*:..*.*.*:..*.*.*:..*.*.*            |     |
| EBOV/Makona/GIN/2014/Kissidougou-C15           | YVQLESRTFPQFLQLNETIYASGKRNTTGKLIWKNVEIDTTIGEWAFWETKKNLTRK              | 300 |
| BOMV/M. condylurus/SLE/2016/PREDICT_SLAB000156 | FVQLESRTFPQFLVELNETIYIEGKRNTTGRLIWNQNSRVDTDVGEWAFWENKKNLKKS            | 296 |
| BOMV/C. pumilus/SLE/2016/PREDICT_SLAB000047    | FVQLESRTFPQFLVELNETIYIEGKRNTTGRLIWNQNSRVDTDVGEWAFWENKKNLKKS            | 296 |
| BOMV/M. condylurus/Kenya/2018/B241             | FVQLESRTFPQFLVELNETIYIEGKRNTTGRLIWNQNSRVDTDVGEWAFWENKKNLKKS            | 296 |
| BOMV/M. condylurus/Kenya/2019/X030             | FVQLESRTFPQFLVELNETIYIEGKRNTTGRLIWNQNSRVDTDVGEWAFWENKKNLKKS            | 296 |
| BOMV/M. condylurus/Kenya/2019/Z153             | FVQLESRTFPQFLVELNETIYIEGKRNTTGRLIWNQNSRVDTDVGEWAFWENKKNLKKS            | 296 |
|                                                | :*****:..*.*.*:..*.*.*:..*.*.*:..*.*.*:..*.*.*:..*.*.*:..*.*.*         |     |
| EBOV/Makona/GIN/2014/Kissidougou-C15           | IRSEELSFTAVSNGFKNISGGSPARTSSDPETNTTNEHKKIMASENSAMVQVHSQGRKA            | 360 |
| BOMV/M. condylurus/SLE/2016/PREDICT_SLAB000156 | FPREELSLTAVPRAADSEHDAHPEYTPGPDNSPTINDNLTVDPAHLVLQQRGRKE                | 356 |
| BOMV/C. pumilus/SLE/2016/PREDICT_SLAB000047    | FPREELSLTAVPRAADSEHDAHPEYTPGPDNSPTINDNLTVDPAHLVLQQRGRKE                | 356 |
| BOMV/M. condylurus/Kenya/2018/B241             | FPREELSAAVPRADSEHDTHPPEHTPGPDNSPTINDNLTVDPAHLVLQQRGRKE                 | 356 |
| BOMV/M. condylurus/Kenya/2019/X030             | FPREELSAAVPRADSEHDTHPPEHTPGPDNSPTINDNLTVDPAHLVLQQRGRKE                 | 356 |
| BOMV/M. condylurus/Kenya/2019/Z153             | FPREELSAAAPRAADSEHDAHPPKHTPGPDNSPTINDNLTVDPAHLVLQQRGRKE                | 356 |
|                                                | : ****:*. :..*.*.* :..*.*.* :..*.*.* :..*.*.* :..*.*.* :..*.*.*        |     |
| EBOV/Makona/GIN/2014/Kissidougou-C15           | AVSHLTTLATISTSPQPTT-TKTGPDNSTHNTVPYKLDISEATQVGGHRRANDNSTASD            | 419 |
| BOMV/M. condylurus/SLE/2016/PREDICT_SLAB000156 | ILPTTIPQAIE---REPPAAQHDNFRNSPTPPSPIESDITDSTQAEDLTHDDPSTINS             | 413 |
| BOMV/C. pumilus/SLE/2016/PREDICT_SLAB000047    | ILPTTIPQAIE---REPPAAQHDNFRNSPTPPSPIESDITDSTQAEDLTHDDPSTINS             | 413 |
| BOMV/M. condylurus/Kenya/2018/B241             | ILPTTIPQAIE---REPPAAQHDNFRNSPTPPSPIESDITDSTQAEDLTHDDPSTINS             | 413 |
| BOMV/M. condylurus/Kenya/2019/X030             | ILPTTIPQAIE---REPPAAQHDNFRNSPTPPSPIESDITDSTQAEDLTHDDPSTINS             | 413 |
| BOMV/M. condylurus/Kenya/2019/Z153             | ILPTTIPQAIE---REPPAAQHDNFRNSPTPPSPIESDITDSTQAEDLTHDDPSTINS             | 413 |
|                                                | : * :..*.*.* :..*.*.* :..*.*.* :..*.*.* :..*.*.* :..*.*.*              |     |
| EBOV/Makona/GIN/2014/Kissidougou-C15           | TPPATTAAGPLKAENTNTSKSADSLDATTSPQNYSETAGNNN---THQD--TGEE                | 473 |
| BOMV/M. condylurus/SLE/2016/PREDICT_SLAB000156 | TEEPLPEVGITTQ---VRDPDEPRRTQPTTPPTGQPEQSDNTMTGGIHSESAAPMGE              | 469 |
| BOMV/C. pumilus/SLE/2016/PREDICT_SLAB000047    | TEKPLPEVGITTQ---VRDPDEPRRTQPTTPPTGQPEQSDNTMTGGIHSESAAPMGE              | 469 |
| BOMV/M. condylurus/Kenya/2018/B241             | TEESLPEVGITTQ---VRDPDEPRITLSTPPTGQPEQSDNTMTGGIHSESAAPMGE               | 469 |
| BOMV/M. condylurus/Kenya/2019/X030             | TEESLPEVGITTQ---VRDPDEPRITLSTPPTGQPEQSDNTMTGGIHSESAAPMGE               | 469 |
| BOMV/M. condylurus/Kenya/2019/Z153             | TEEPLPEVGITTQ---VRDPDEPGITLPTPTGQPEQSDNTMTGGIHSESAAPMGE                | 469 |
|                                                | * .* . :..*.*.* :..*.*.* :..*.*.* :..*.*.* :..*.*.*                    |     |
| EBOV/Makona/GIN/2014/Kissidougou-C15           | ASSGKLGLINTIAGVAGLITGGRRTRREVIVNAQPKCNPNLHYWTTQDEGAAIGLAWIP            | 533 |
| BOMV/M. condylurus/SLE/2016/PREDICT_SLAB000156 | RSIDGPGLLTNTLAGVARLITAGRAKRESPEIRGAKCNPNLHYWTTHEESAAAGLAWIP            | 529 |
| BOMV/C. pumilus/SLE/2016/PREDICT_SLAB000047    | RSIDGPGLLTNTLAGVARLITAGRAKRESPEIRGAKCNPNLHYWTTHEESAAAGLAWIP            | 529 |
| BOMV/M. condylurus/Kenya/2018/B241             | RSIDGPGLLTNTLAGVARLITAGRAKRESPEIRGAKCNPNLHYWTTHEESAAAGLAWIP            | 529 |
| BOMV/M. condylurus/Kenya/2019/X030             | RSIDGPGLLTNTLAGVARLITAGRAKRESPEIRGAKCNPNLHYWTTHEESAAAGLAWIP            | 529 |
| BOMV/M. condylurus/Kenya/2019/Z153             | RSIDGPGLLTNTLAGVARLITAGRAKRESPEIRGAKCNPNLHYWTTHEESAAAGLAWIP            | 529 |
|                                                | * **:*.*.*:..*.*.*:..*.*.*:..*.*.*:..*.*.*:..*.*.*:..*.*.*             |     |
| EBOV/Makona/GIN/2014/Kissidougou-C15           | YFGPAAEGIYTEGLMHNQDGLICGLRQLANETTQALQLFLRSTTELRTFSILNRKAIDFL           | 593 |
| BOMV/M. condylurus/SLE/2016/PREDICT_SLAB000156 | YFGPAAEGIYTEGLMHNQNELICGLRQLANETTQALQLFLRSTTELRTFSILNRKAIDFL           | 589 |
| BOMV/C. pumilus/SLE/2016/PREDICT_SLAB000047    | YFGPAAEGIYTEGLMHNQNELICGLRQLANETTQALQLFLRSTTELRTFSILNRKAIDFL           | 589 |
| BOMV/M. condylurus/Kenya/2018/B241             | YFGPAAEGIYTEGLMHNQNELICGLRQLANETTQALQLFLRSTTELRTFSILNRKAIDFL           | 589 |
| BOMV/M. condylurus/Kenya/2019/X030             | YFGPAAEGIYTEGLMHNQNELICGLRQLANETTQALQLFLRSTTELRTFSILNRKAIDFL           | 589 |
| BOMV/M. condylurus/Kenya/2019/Z153             | YFGPAAEGIYTEGLMHNQNELICGLRQLANETTQALQLFLRSTTELRTFSILNRKAIDFL           | 589 |
|                                                | *****:..*.*.*:..*.*.*:..*.*.*:..*.*.*:..*.*.*:..*.*.*:..*.*.*          |     |
| EBOV/Makona/GIN/2014/Kissidougou-C15           | LQRWGGTCHILGPDCCIEPHDWTKNITDKIDQI IHDFVDKLPDQGDNDNWTGWQRQWIP           | 653 |
| BOMV/M. condylurus/SLE/2016/PREDICT_SLAB000156 | LQRWGGTCHILGPDCCIEPHDWTKNITDRIDQI IHDFVDKLPDQGDNDNWTGWQRQWIP           | 649 |
| BOMV/C. pumilus/SLE/2016/PREDICT_SLAB000047    | LQRWGGTCHILGPDCCIEPHDWTKNITDRIDQI IHDFVDKLPDQGDNDNWTGWQRQWIP           | 649 |
| BOMV/M. condylurus/Kenya/2018/B241             | LQRWGGTCHILGPDCCIEPHDWTKNITDRIDQI IHDFVDKLPDQGDNDNWTGWQRQWIP           | 649 |
| BOMV/M. condylurus/Kenya/2019/X030             | LQRWGGTCHILGPDCCIEPHDWTKNITDRIDQI IHDFVDKLPDQGDNDNWTGWQRQWIP           | 649 |
| BOMV/M. condylurus/Kenya/2019/Z153             | LQRWGGTCHILGPDCCIEPHDWTKNITDRIDQI IHDFVDKLPDQGDNDNWTGWQRQWIP           | 649 |
|                                                | *****:..*.*.*:..*.*.*:..*.*.*:..*.*.*:..*.*.*:..*.*.*:..*.*.*          |     |
| EBOV/Makona/GIN/2014/Kissidougou-C15           | AGIGVTGVIIAIVIALFCICKFVF                                               | 676 |
| BOMV/M. condylurus/SLE/2016/PREDICT_SLAB000156 | AGIGVGVGIIAIFALICICKIIC                                                | 672 |
| BOMV/C. pumilus/SLE/2016/PREDICT_SLAB000047    | AGIGVGVGIIAIFALICICKIIC                                                | 672 |
| BOMV/M. condylurus/Kenya/2018/B241             | AGIGVGVGIIAIFALICICKIIC                                                | 672 |
| BOMV/M. condylurus/Kenya/2019/X030             | AGIGVGVGIIAIFALICICKIIC                                                | 672 |
| BOMV/M. condylurus/Kenya/2019/Z153             | AGIGVGVGIIAIFALICICKIIC                                                | 672 |
|                                                | *****:..*.*.*:..*.*.*:..*.*.*:..*.*.*:..*.*.*:..*.*.*:..*.*.*          |     |

**Supplementary Figure S1.** Sequence alignment of the EBOV GP sequence to four BOMV isolates GP. Residues involved in direct interaction with the NPC1 receptor are outlined in black, with the BOMV S146 polymorphism highlighted in red. The highly-conserved coiled-coil domain is outlined in blue with sequence polymorphisms at P558 and D607 highlighted in red for the single BOMV isolate from *C. pumilus*

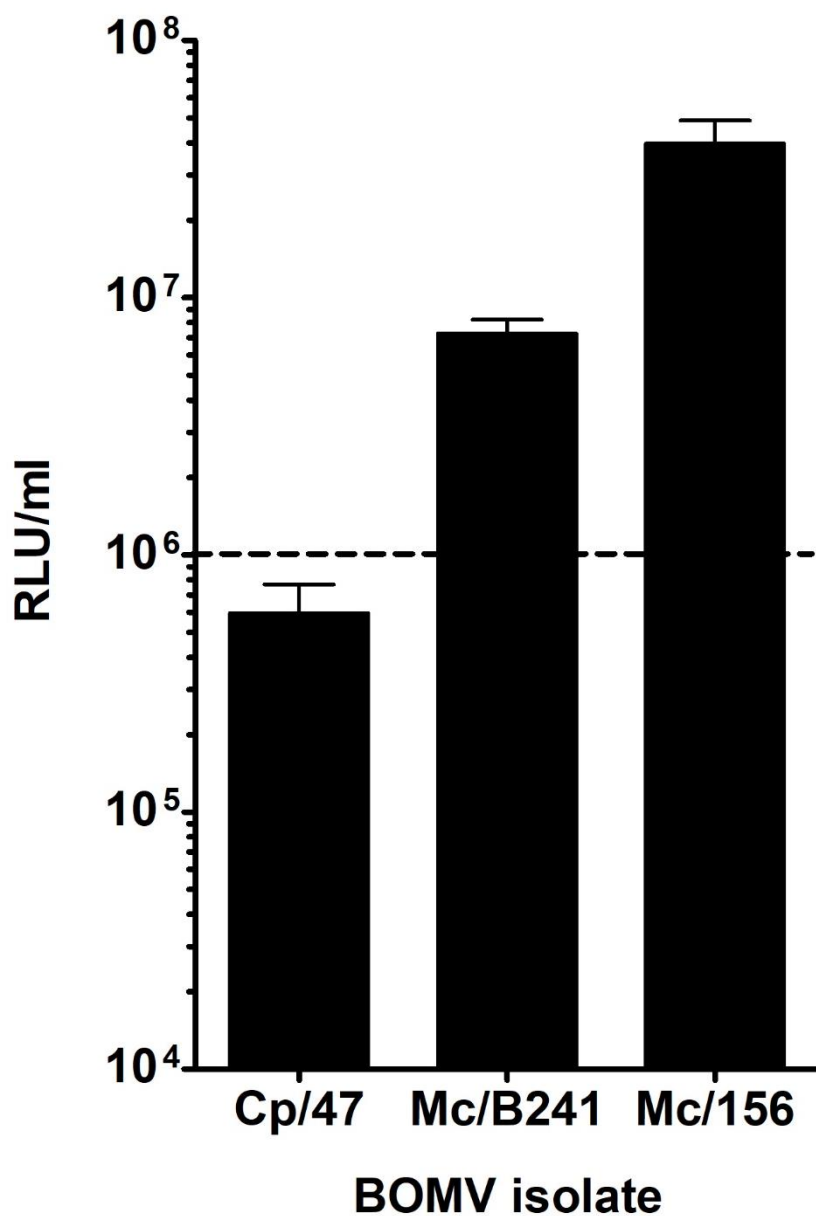

**Supplementary Figure S2.** Mean titres of lentiviral pseudotype bearing different Bombali ebolavirus (BOMV) isolate GP. Supernatant from LVV producer cells for *C. pu-milus*/SLE/2016/PREDICT\_SLAB000047 (Cp/47), *M. condylurus*/Kenya/B241 (Mc/B241) and *M. condylurus*/SLE/2016/PREDICT\_SLAB000156 (MC/156) were titrated onto HEK 293T/17 cells. The dotted line indicates the minimum titre required for use in downstream assays. Error bars indicate SEM (n=2).
